# Supplementary material for: Enhancing the effect of metal–nitrogen–carbon nanotubes with cobalt phthalocyanine on the electrochemical reduction of CO2
Source: Royal Society of Chemistry journal article supplement (doi:10.1039/d4nj00941j), 2024-01-01
Supplement: d4nj00941j1.pdf [file d4nj00941j1.pdf]

## Supporting Informations

### **Enhancing effect of metal-nitrogen-carbon nanotubes with cobalt phthalocyanine on electrochemical reduction of CO<sub>2</sub>**

Ming Li <sup>a,b</sup>, Hong-Lin Zhu <sup>b</sup>, Xiao-fei Wang <sup>b</sup>, Zhong-Yi Li <sup>b</sup>, Jing-Jing Ma <sup>b</sup>, Ya-Jun Guo <sup>b</sup>,

Yue-Qing Zheng\* <sup>b</sup>

<sup>a</sup> China Certification & Inspection Group Ningbo Co., Ltd, Ningbo, Zhejiang, 315048, P. R. China

<sup>b</sup> Chemistry Institute for Synthesis and Green Application, School of Material Science and

Chemical Engineering, Ningbo University, Ningbo, 315211, P. R. China

<sup>c</sup> ZhiEn Middle School of Ninghai, Ningbo, 315699, , P. R. China

\*Corresponding author: Yue-Qing Zheng

*E-mail address: [zhengyueqing@nbu.edu.cn](mailto:zhengyueqing@nbu.edu.cn)*

## 1. Characterization

The Powder X-ray diffraction was carried out with a Bruker D8 Focus X-ray diffractometer with Cu-K $\alpha$  radiation ( $\lambda = 1.54178 \text{ \AA}$ ). Scanning Electron Microscope (SEM) was performed by using a Hitachi's new SU-70 type of thermal field emission instruments. The low and high resolution transmission electron microscopy (TEM) and the corresponding energy dispersive spectroscopy mapping analyses were performed on JME-2100. The X-ray photoelectron spectroscopy (XPS) was obtained on Escalab 250Xi instrument with a monochromatic Al K $\alpha$  X-ray radiation source. The content of metal ions was determined by inductively coupled plasma optical emission spectrometer (ICAP 7200 ICP-OES). The liquid products were performed by Bruker 400 HZ NMR spectroscopy with TMS as an internal standard. The content of CO was analyzed by gas chromatograph (GC-2060) with flame ionization detector (FID).

## 2. Evaluation of Electrochemical Reduction CO<sub>2</sub>

The working electrode was prepared by drop-drying method with 5 mg catalysts in a solution containing 120  $\mu\text{L}$  Nafion solution, 400  $\mu\text{L}$  isopropanol alcohol and 600  $\mu\text{L}$  water. The suspension was sonicated for 30 min to obtain a homogeneous catalyst ink. Finally, 70  $\mu\text{L}$  of catalyst ink were drop casted onto  $1 \times 0.5 \text{ cm}^2$  carbon cloth (loading:  $0.3 \text{ mg cm}^{-2}$ ). The electrochemical measurements were carried out with three-electrode system in 0.5 M KHCO<sub>3</sub> solution on CHI 760E electrochemical workstation (ChenHua, Shanghai). A platinum sheet and Ag/AgCl electrode (saturated KCl) were used as a counter electrode and the reference electrode, respectively. All the measured potentials vs. Ag/AgCl were converted to reversible hydrogen electrode (RHE):  $E_{\text{RHE}} = E_{\text{Ag/AgCl}} + 0.059 \times \text{pH} + 0.197 \text{ V}$ . The value of faradaic efficiency (FE) was calculated according to the formula:  $\text{FE} = 2F \times n_{\text{CO}} / Q = 2F \times n_{\text{CO}} / (I \times t)$ , where F is 96485 C/mol and  $n_{\text{CO}}$  is the molar

mass of CO. The TOF value of the electrocatalyst *via* mass loading was calculated as follows:

$\text{TOF}(\text{s}^{-1}) = \frac{I \cdot FE / 2F}{m \cdot \omega / M_r}$ . The ECSA was calculated by the electrochemical double-layer capacitance ( $C_{dl}$ )

with the cyclic voltammetry (CV) curves in non-faradaic potential region.

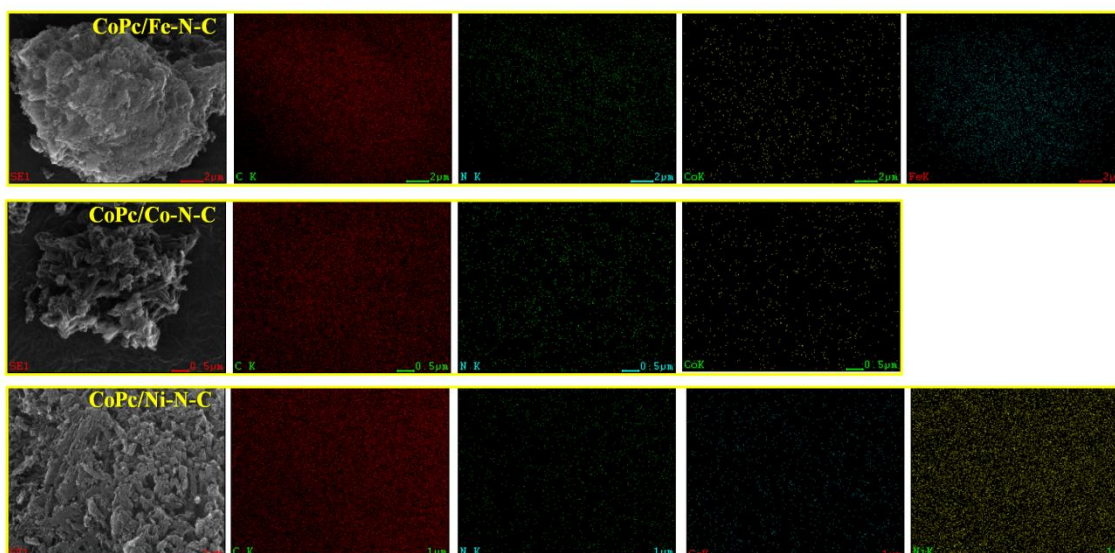

Figure S1. Element mapping of CoPc/M-N-C.

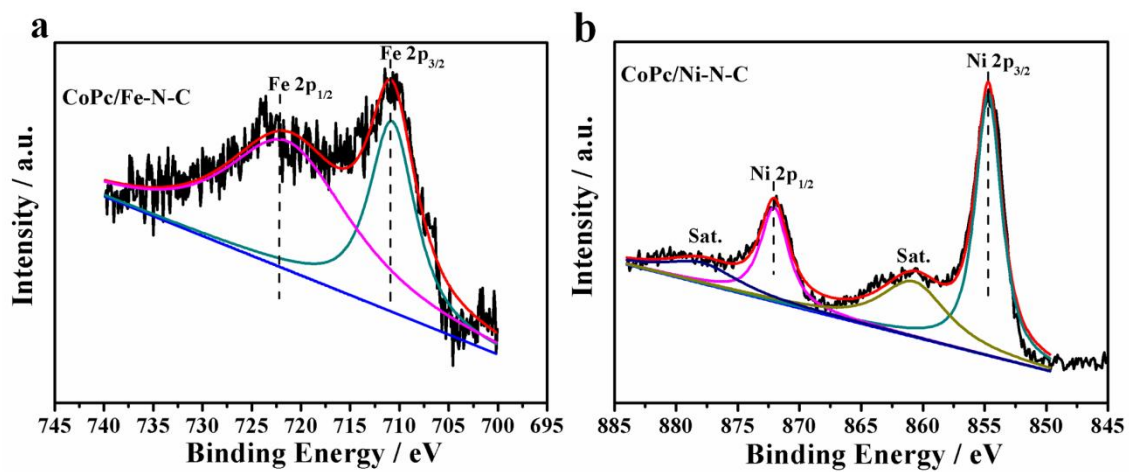

Figure S2. (a) Fe 2p and (b) Ni 2p high resolution XPS spectra of catalysts.

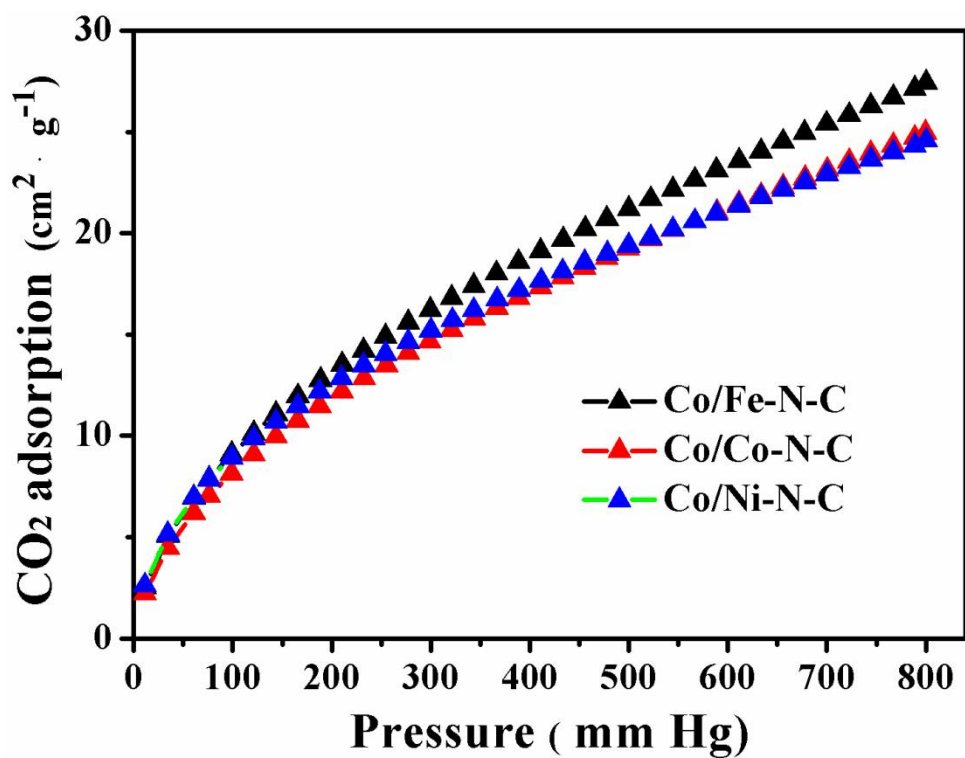

Figure S3. CO<sub>2</sub> adsorption isotherms of CoPc/M-N-C.

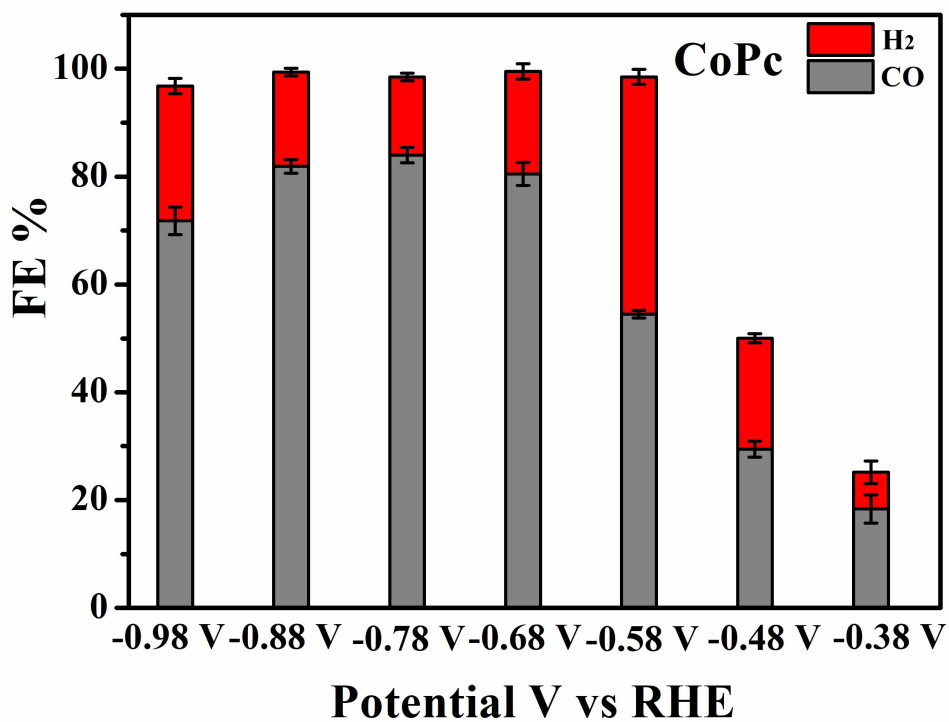

Figure S4 Faradic efficiency of CoPc

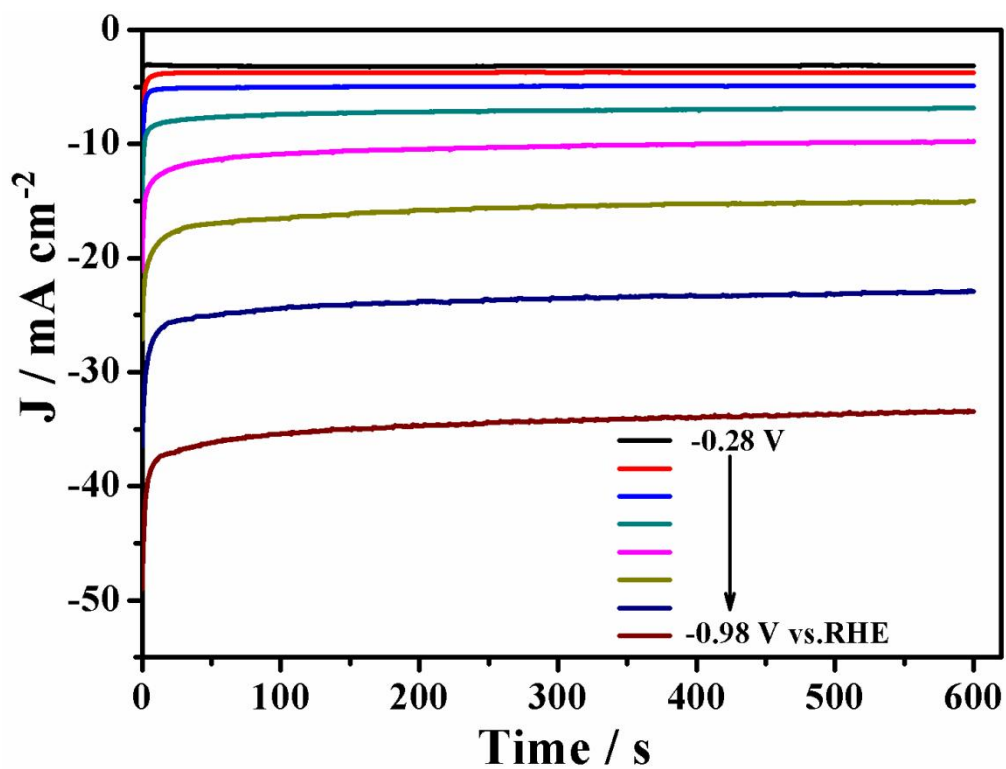

Figure S5. Current densities for CoPc/Fe-N-C at various potential.

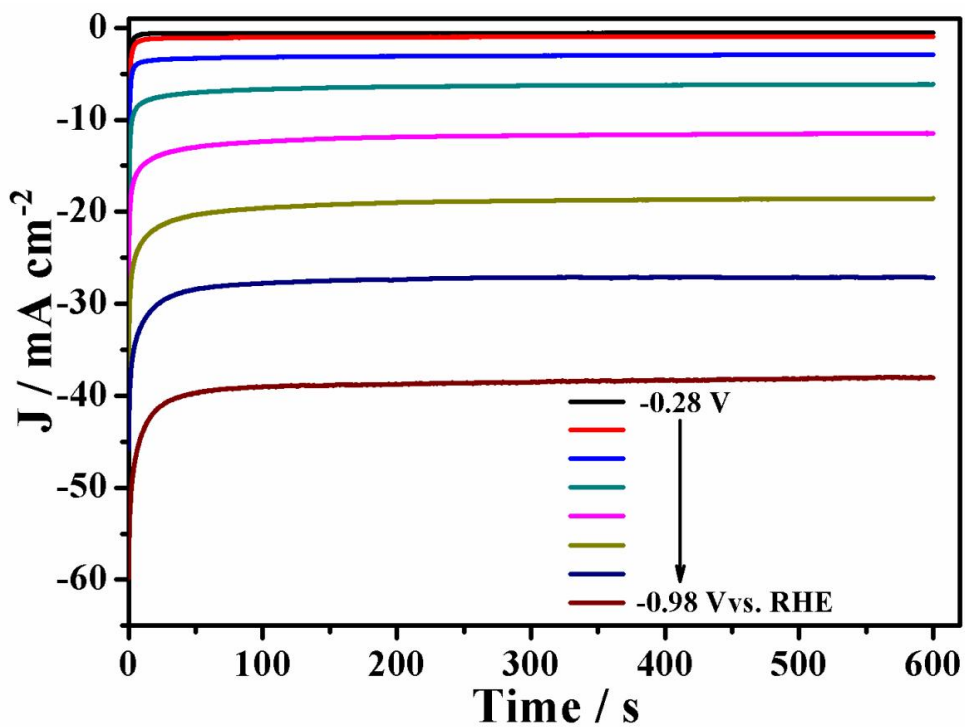

Figure S6. Current densities for CoPc/Co-N-C at various potential.

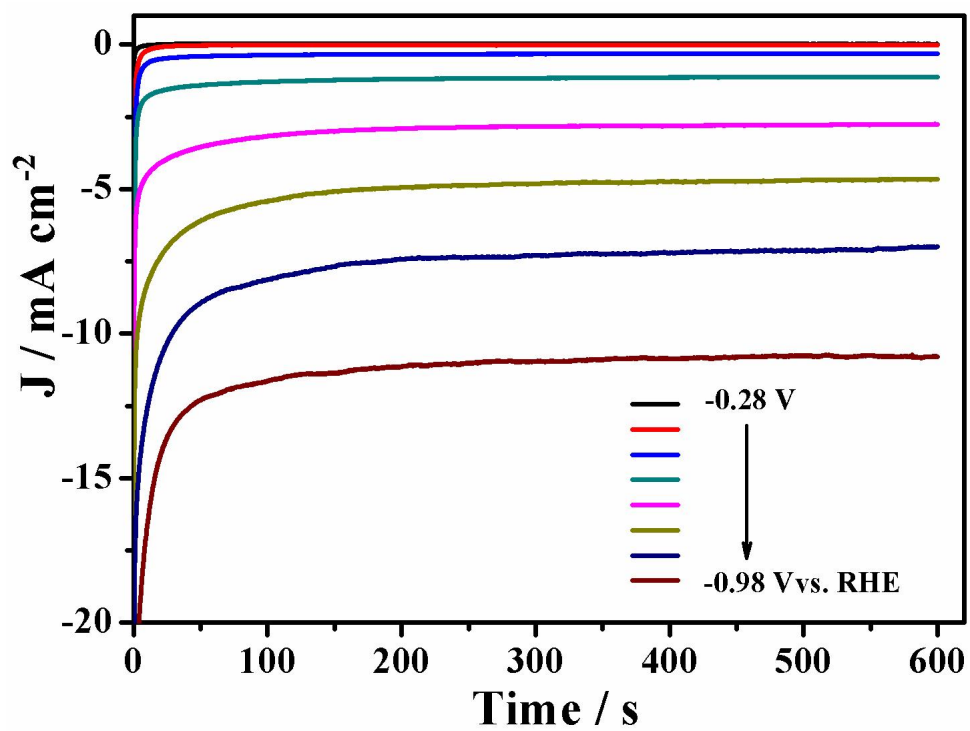

Figure S7. Current densities for CoPc/Ni-N-C at various potential.

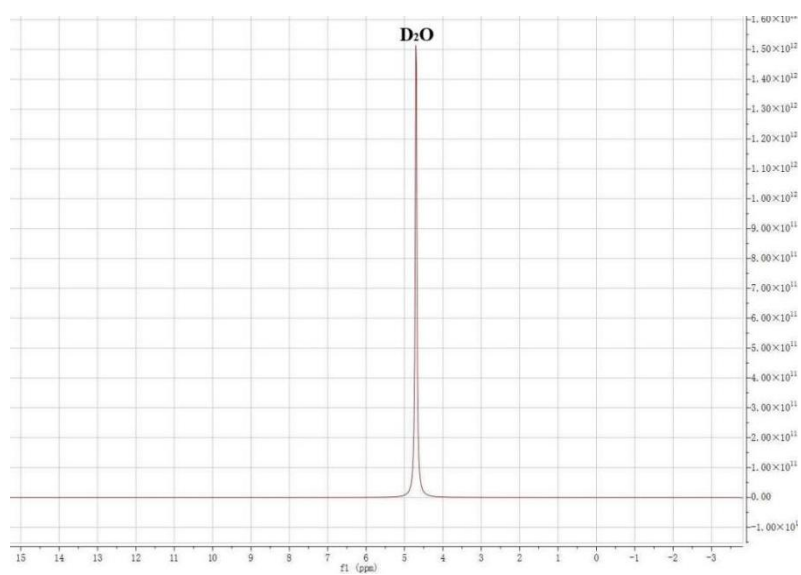

Figure S8. Liquid NMR spectrum at  $-0.68$  V vs.RHE for CoPc/Fe-N-C.

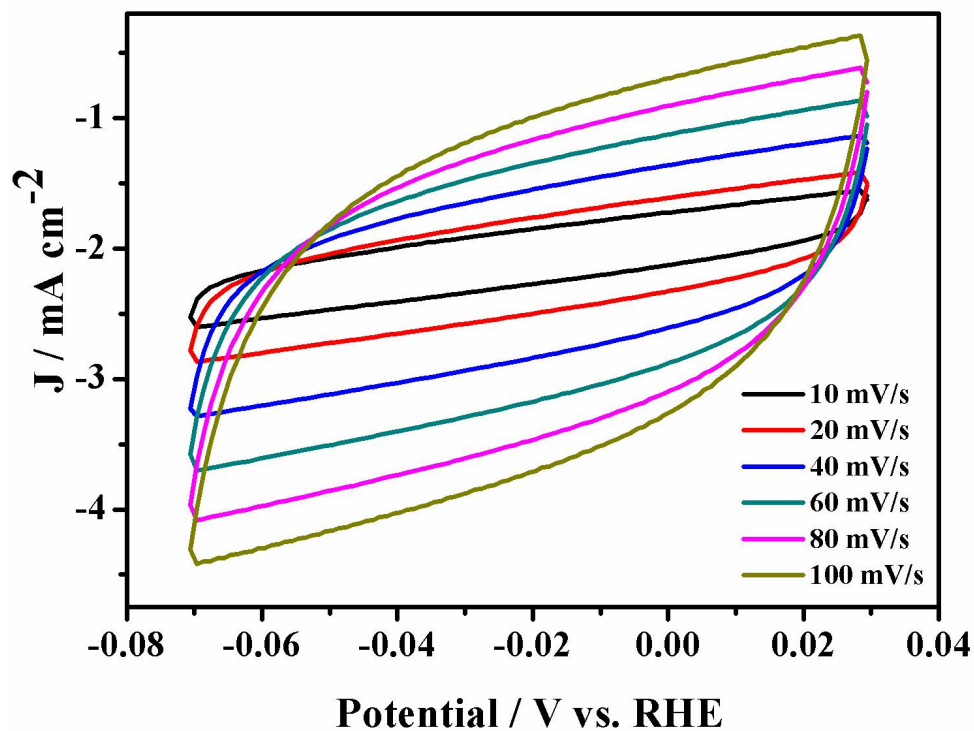

Figure S9. CVs plots in the non-faradaic potential for CoPc/Fe-N-C.

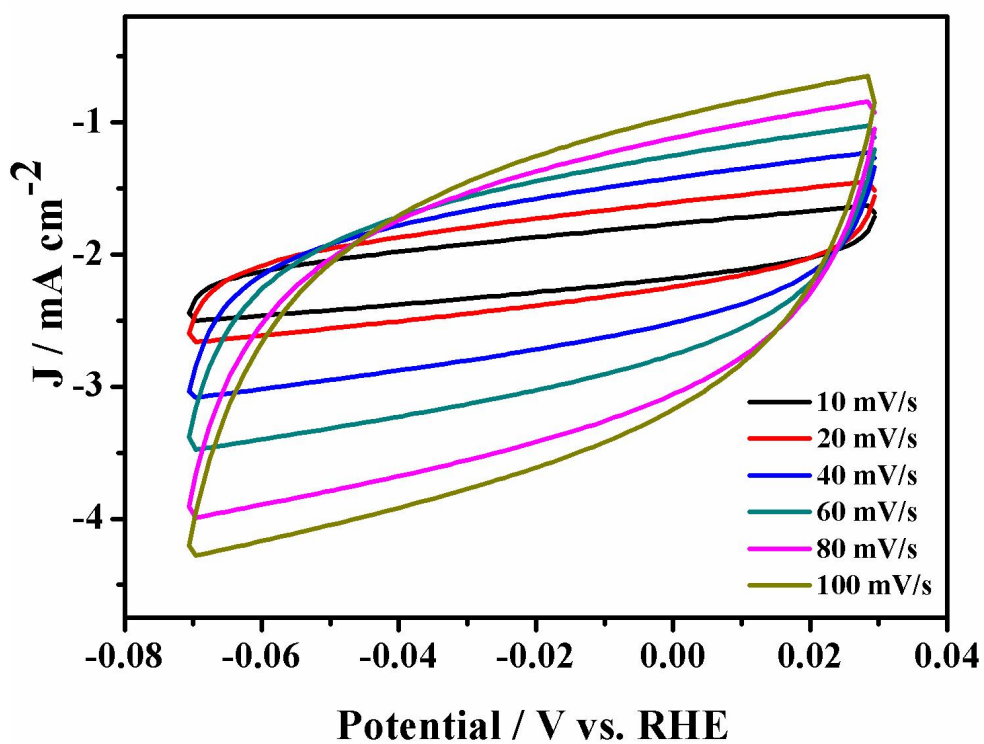

Figure S10. CVs plots in the non-faradaic potential for CoPc/Co-N-C.



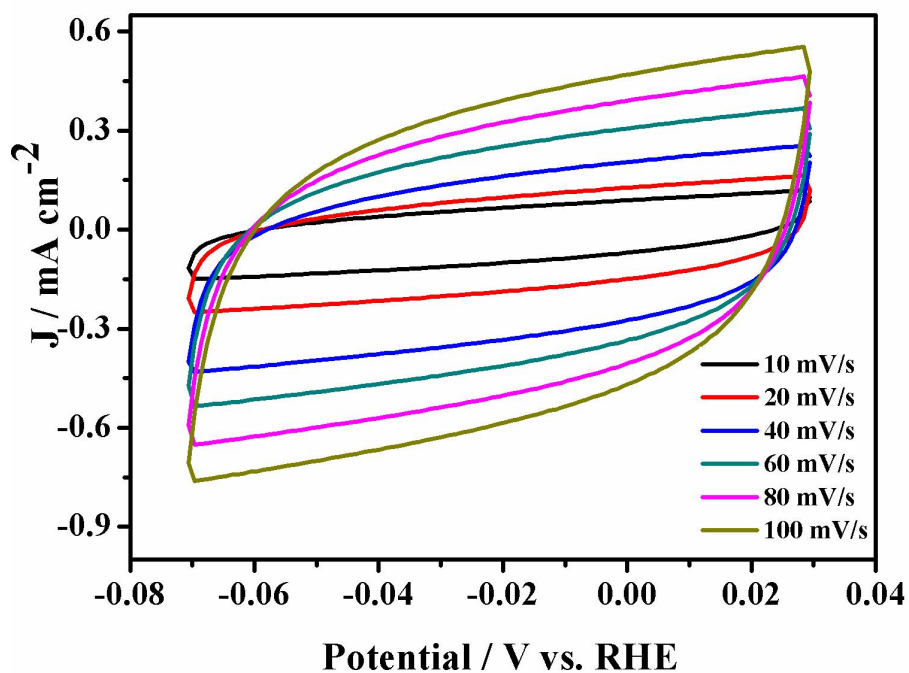

Figure S11. CVs plots in the non-faradaic potential for CoPc/Ni-N-C.

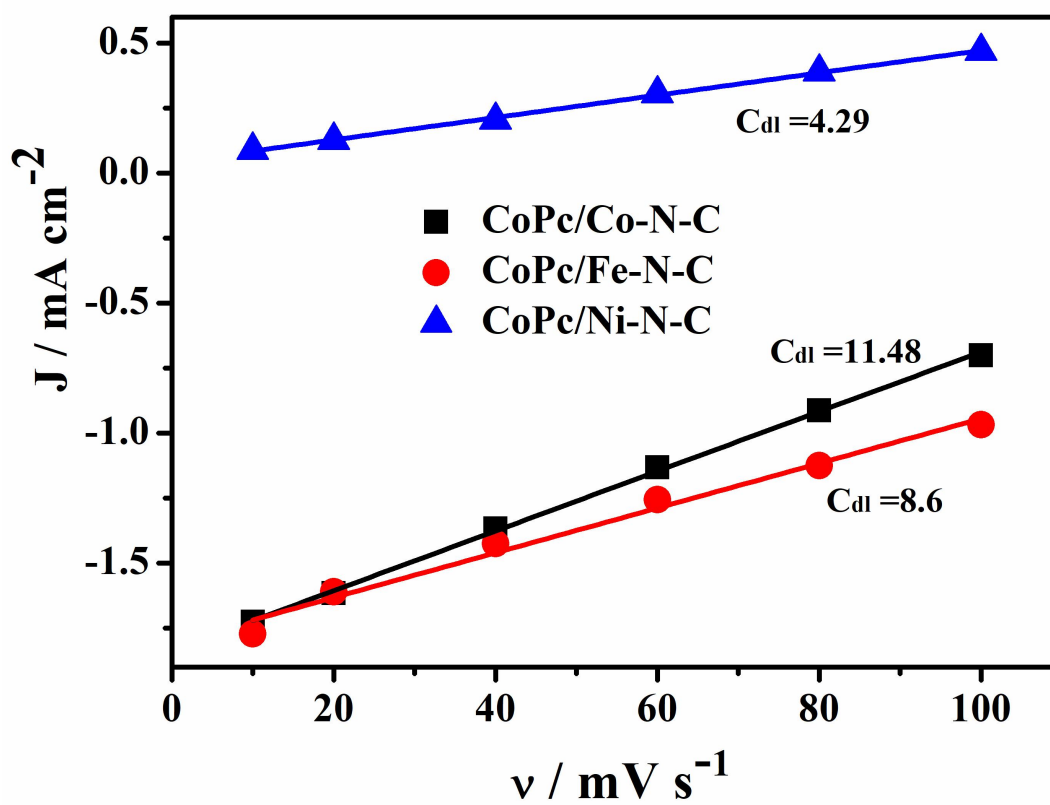

Figure S12. Current densities against the scan rates of CoPc/M-N-C.

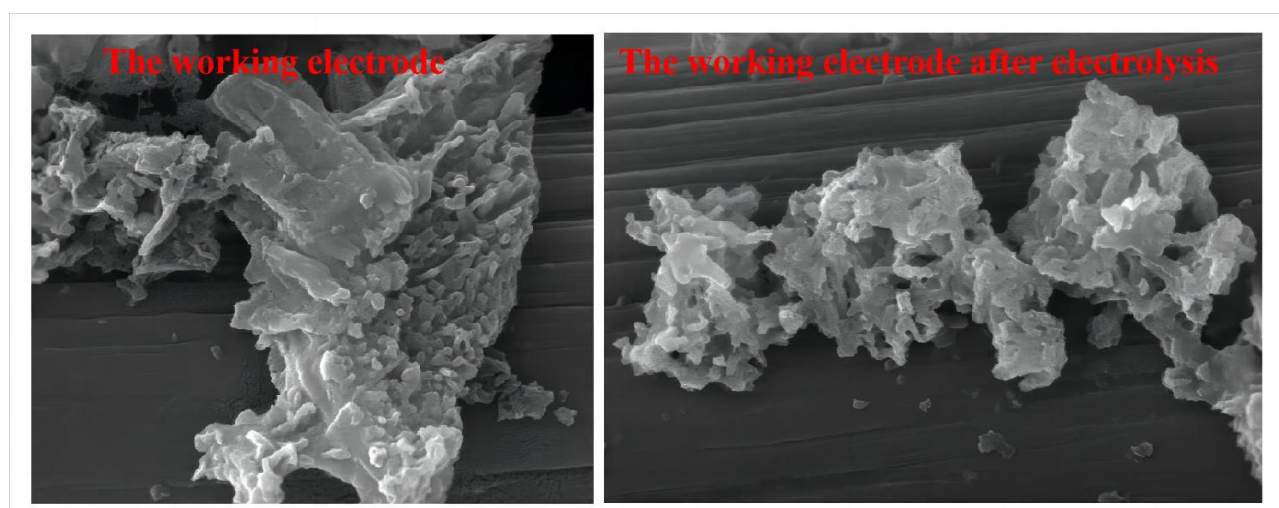

Figure S13. The SEM image of CoPc/Ni-N-C ink on carbon cloth

**Table S1** ICP-OES results of transition metal loading amount.

| Catalysts   | Co (wt%) | Fe (wt%) | Ni (wt%) |
|-------------|----------|----------|----------|
| CoPc/Fe-N-C | 0.092    | 0.118    |          |
| CoPc/Co-N-C | 0.230    |          |          |
| CoPc/Ni-N-C | 0.182    |          | 0.075    |

**Table S2** Porous properties of CoPc/M-N-C

| Catalysts   | $S_{\text{Langmuir}}$ ( $\text{m}^2 \text{g}^{-1}$ ) | $V_p$ ( $\text{cm}^3 \text{g}^{-1}$ ) | Pore width (nm) |
|-------------|------------------------------------------------------|---------------------------------------|-----------------|
| CoPc/Fe-N-C | 97.16                                                | 0.0476                                | 4.27            |
| CoPc/Co-N-C | 89.00                                                | 0.0433                                | 4.31            |
| CoPc/Ni-N-C | 87.34                                                | 0.0429                                | 4.05            |

**Table S3** Summary of electrocatalytic CO<sub>2</sub>RR with CoPc based catalysts reported in the literature

| Catalysts                             | Load<br>(mg/cm <sup>2</sup> ) | Produ<br>ct        | On-set                       | Faradaic efficiency       |                  | TOF (S <sup>-1</sup> ) | Tafel                 | Ref.       |
|---------------------------------------|-------------------------------|--------------------|------------------------------|---------------------------|------------------|------------------------|-----------------------|------------|
|                                       |                               |                    | Potentials<br>(V vs.<br>RHE) | Potentials<br>(V vs. RHE) | FE <sub>CO</sub> |                        | slope<br>(mV/de<br>c) |            |
| CoPc-P4VP                             | -                             | CO, H <sub>2</sub> | -0.48                        | -0.73                     | >90%             | 4.8 (-0.73 V)          | -                     | 1          |
| CoPc-A/CCG                            | 0.12                          | CO, H <sub>2</sub> | -0.49                        | -0.79                     | 91.5%            | 5.0 (-0.6 V)           | 172                   | 2          |
| CoPc-py-CNT                           | -                             | CO, H <sub>2</sub> | -0.40                        | -0.53                     | 91%              | 34.5 (-0.63 V)         | 117                   | 3          |
| CoPc/ZnIn <sub>2</sub> S <sub>4</sub> | 0.50                          | CO, H <sub>2</sub> | -                            | -0.73                     | 93%              | -                      | 141                   | 4          |
| CoPc/CNT                              | 0.40                          | CO, H <sub>2</sub> | -0.46                        | -0.63                     | 92%              | 2.7 (-0.63 V)          | -                     | 5          |
| CoPc-CN/CNT                           | 0.40                          | CO, H <sub>2</sub> | -0.46                        | -0.63                     | 98%              | 4.1 (-0.63 V)          | -                     | 5          |
| CoPc/CNT-2                            | 0.40                          | CO, H <sub>2</sub> | -0.40                        | -0.60                     | >90%             | 2.2 (-0.61 V)          | -                     | 6          |
| CoPc/C                                | 0.30                          | CO, H <sub>2</sub> | -0.30                        | -0.60                     | >90%             | 3.9 (-0.70 V)          | 178                   | 7          |
| Co-N <sub>5</sub> /HNPCSS             | -                             | CO, H <sub>2</sub> | -0.37                        | -0.57                     | >90%             | 0.14 (-0.70 V)         | -                     | 8          |
| CoPc@Fe-N-C                           | -                             | CO, H <sub>2</sub> | -0.13                        | -0.23                     | >90%             | -                      | -                     | 9          |
| U <sub>120</sub> -CoPc/KB             | 0.30                          | CO, H <sub>2</sub> | -0.2                         | -0.7                      | 96.4%            | -                      | 118                   | 10         |
| CoPc/Fe-N-C                           | 0.30                          | CO, H <sub>2</sub> | -0.28                        | -0.48                     | 99%              | 6.33 (-0.48 V)         | 142                   | This study |
| CoPc/Ni-N-C                           | 0.30                          | CO, H <sub>2</sub> | -0.28                        | -0.58                     | >90%             | 1.15 (-0.48 V)         | 146                   | This study |
| CoPc/Co-N-C                           | 0.30                          | CO, H <sub>2</sub> | -0.28                        | -0.68                     | 74%              | 1.26 (-0.48 V)         | 189                   | This study |

## Reference

1. W. W. Kramer, C. C. L. McCrory. Polymer coordination promotes selective CO<sub>2</sub> reduction by cobalt phthalocyanine. *Chem. Sci.*, 2016, **7**, 2506–2515.
2. J. Choi, P. Wagner, S. Gambhir, R. Jalili, D. R. MacFarlane, G. G. Wallace, D. L. Officer. Steric modification of a cobalt phthalocyanine/graphene catalyst to give enhanced and stable electrochemical CO<sub>2</sub> reduction to CO, *ACS Energy Lett.*, 2019, **4**, 666-672.
3. M. Zhu, J. Chen, R. Guo, J. Xu, X. Fang, Y. Han. Cobalt phthalocyanine coordinated to pyridine-functionalized carbon nanotubes with enhanced CO<sub>2</sub> electroreduction, *Appl. Catal. B Environ.*, 2019, **251**, 112–118.
4. C. Chen, X. Sun, D. Yang, L. Lu, H. Wu, L. Zheng, P. An, J. Zhang, B. Han. Enhanced CO<sub>2</sub> electroreduction via interaction of dangling S bonds and Co sites in cobalt

- phthalocyanine/ZnIn<sub>2</sub>S<sub>4</sub> hybrids, *Chem. Sci.*, 2019, **10**, 1659–1663.
5. X. Zhang, Z. Wu, X. Zhang, L. Li, Y. Li, H. Xu, X. Li, X. Yu, Z. Zhang, Y. Liang, H. Wang. Highly selective and active CO<sub>2</sub> reduction electrocatalysts based on cobalt phthalocyanine/carbon nanotube hybrid structures, *Nat. Commun.*, 2017, **8**, 14675.
  6. Z. Jiang, Y. Wang, X. Zhang, H. Zheng, X. Wang, Y. Liang, Revealing the hidden performance of metal phthalocyanines for CO<sub>2</sub> reduction electrocatalysis by hybridization with carbon nanotubes, *Nano Res.*, 2019, **12**, 2330–2334.
  7. J. Ma, H. Zhu, Y. Zheng, M. Shui, An insight into anchoring of cobalt phthalocyanines onto carbon: Efficiency of the CO<sub>2</sub> reduction reaction, *ACS Appl. Energy Mater.*, 2021, **4**, 1442-1448.
  8. Y. Pan, R. Lin, Y. Chen, S. Liu, W. Zhu, X. Cao, W. Chen, K. Wu, W. Cheong, Y. Wang, L. Zheng, J. Luo, Y. Lin, Y. Liu, C. Liu, J. Li, Q. Lu, X. Chen, D. Wang, Q. Peng, C. Chen, Y. Li. Design of single-atom Co–N<sub>5</sub> catalytic site: A robust electrocatalyst for CO<sub>2</sub> reduction with nearly 100% CO selectivity and remarkable stability, *J. Am. Chem. Soc.*, 2018, **140**, 4218-4221.
  9. L. Lin, H. Li, C. Yan, H. Li, R. Si, M. Li, J. Xiao, G. Wang, X. Bao. Synergistic catalysis over iron-nitrogen sites anchored with cobalt phthalocyanine for efficient CO<sub>2</sub> electroreduction, *Adv. Mater.*, 2019, 1903470.
  10. H. Zhu, L. Zhang, M. Shui, Z. Li, J. Ma, Y. Zheng, A novel manner of anchoring cobalt phthalocyanine on edge defected carbon for highly electrocatalytic CO<sub>2</sub> reduction, *J. Phys. Chem. Lett.*, 2023, **14**, 3844–3852
